# Supplementary material for: Identification of umami peptides based on virtual screening and molecular docking from Atlantic cod (Gadus morhua)
Source: Royal Society of Chemistry journal article supplement (doi:10.1039/d2fo03776a), 2023-01-01

**Table captions**

**Table. S1** PeptideRanker prediction score of 250 peptides.

| Peptide | Score |
|---------|-------|---------|-------|---------|-------|---------|-------|---------|-------|
| GPW     | 0.99  | VAM     | 0.26  | QVH     | 0.08  | AQQM    | 0.35  | NDEK    | 0.05  |
| SGW     | 0.94  | QAR     | 0.26  | EIH     | 0.08  | SQPH    | 0.34  | TVSA    | 0.04  |
| GDF     | 0.94  | DKP     | 0.25  | ESR     | 0.08  | DGTR    | 0.26  | IVEK    | 0.04  |
| GNF     | 0.94  | AGK     | 0.24  | QDK     | 0.07  | KPVL    | 0.26  | EVAQ    | 0.03  |
| QGF     | 0.94  | AQL     | 0.23  | ENY     | 0.07  | VPAH    | 0.24  | DVET    | 0.03  |
| KPW     | 0.93  | IIH     | 0.23  | VTG     | 0.07  | HDNL    | 0.24  | EEVA    | 0.03  |
| YPM     | 0.91  | ISR     | 0.23  | VQH     | 0.07  | ETPM    | 0.24  | GGMPM   | 0.94  |
| GMY     | 0.89  | SQL     | 0.22  | DSV     | 0.06  | NDPK    | 0.23  | GPPPK   | 0.83  |
| ACC     | 0.88  | EVF     | 0.22  | SVS     | 0.06  | SDGK    | 0.23  | AMPAP   | 0.80  |
| VPW     | 0.88  | NIR     | 0.22  | TTR     | 0.06  | QSPK    | 0.22  | SGDAW   | 0.76  |
| GYP     | 0.85  | DDY     | 0.22  | AVK     | 0.06  | QAAR    | 0.20  | NDDGW   | 0.68  |
| AGM     | 0.82  | DGS     | 0.21  | TVY     | 0.06  | AKPK    | 0.20  | SPNQM   | 0.59  |
| GGR     | 0.81  | SSY     | 0.21  | VDD     | 0.05  | AQQR    | 0.18  | GQRPR   | 0.59  |
| DNW     | 0.79  | AEM     | 0.21  | STK     | 0.05  | GNAK    | 0.17  | GNSPY   | 0.49  |
| ASW     | 0.78  | KPK     | 0.20  | VVH     | 0.05  | VHPK    | 0.16  | AAPSL   | 0.48  |
| RPL     | 0.77  | VAG     | 0.15  | VQQ     | 0.04  | NQQY    | 0.15  | GPGEY   | 0.47  |
| GDM     | 0.76  | TIL     | 0.15  | AEK     | 0.04  | PATK    | 0.14  | NHDQF   | 0.45  |
| QGM     | 0.76  | SSI     | 0.15  | VER     | 0.04  | QTIG    | 0.14  | SPSEM   | 0.37  |
| MDW     | 0.75  | TPK     | 0.15  | QEQ     | 0.04  | GSNS    | 0.13  | QPPTQ   | 0.35  |
| DDF     | 0.75  | SVG     | 0.15  | EAK     | 0.04  | EPVR    | 0.13  | CEQIM   | 0.34  |
| QDF     | 0.74  | AVL     | 0.14  | EER     | 0.04  | SSVR    | 0.13  | NIPSR   | 0.32  |
| SCL     | 0.71  | PDE     | 0.14  | NEK     | 0.03  | DSNH    | 0.13  | EMPTR   | 0.29  |
| QSF     | 0.70  | ATR     | 0.13  | DEV     | 0.03  | DVDY    | 0.13  | SVQGL   | 0.29  |
| EGF     | 0.69  | TAL     | 0.13  | EEA     | 0.03  | TPER    | 0.12  | SASVC   | 0.25  |
| ICR     | 0.68  | TIR     | 0.12  | VVK     | 0.03  | DEIY    | 0.12  | DDDDR   | 0.25  |
| PGI     | 0.67  | ITR     | 0.12  | TEK     | 0.02  | ITIH    | 0.12  | EAGDP   | 0.25  |
| PIL     | 0.64  | NSH     | 0.12  | EVK     | 0.02  | TNVM    | 0.12  | PCSTT   | 0.25  |
| IPY     | 0.62  | SAQ     | 0.12  | EEK     | 0.02  | VSDR    | 0.10  | GDIIQ   | 0.19  |
| GIL     | 0.61  | DSA     | 0.12  | MPPL    | 0.94  | VSNR    | 0.10  | ISVNP   | 0.16  |
| QPY     | 0.56  | DTY     | 0.11  | MPQM    | 0.87  | AVVL    | 0.09  | DAIAK   | 0.14  |
| SGL     | 0.56  | AAK     | 0.11  | CSMY    | 0.80  | QQAK    | 0.09  | VNGGV   | 0.13  |
| SAM     | 0.53  | TNL     | 0.11  | QTGW    | 0.69  | ANER    | 0.09  | VSPSK   | 0.13  |
| ADC     | 0.51  | TSL     | 0.11  | NPPH    | 0.67  | GVAT    | 0.09  | QTTGR   | 0.11  |
| GDY     | 0.50  | NQH     | 0.11  | VSGW    | 0.65  | GVNS    | 0.09  | EIPAE   | 0.11  |
| QGY     | 0.48  | GTK     | 0.11  | IGDM    | 0.61  | EASR    | 0.08  | EPSER   | 0.10  |
| GNY     | 0.48  | VGS     | 0.11  | AGCD    | 0.60  | CTEK    | 0.08  | TTQAM   | 0.10  |
| NGR     | 0.46  | NIK     | 0.10  | GNIC    | 0.59  | AENR    | 0.08  | INQQA   | 0.08  |
| CIN     | 0.45  | NNA     | 0.10  | DCIY    | 0.58  | GNEK    | 0.08  | AAVAT   | 0.08  |
| CQH     | 0.41  | TQL     | 0.10  | STMP    | 0.55  | EGQK    | 0.07  | DDNSV   | 0.08  |
| CIK     | 0.37  | GEN     | 0.10  | SPAR    | 0.53  | GVTK    | 0.07  | TANQR   | 0.08  |

|     |      |     |      |      |      |      |      |       |      |
|-----|------|-----|------|------|------|------|------|-------|------|
| VPL | 0.37 | INK | 0.10 | QDTW | 0.52 | NTIK | 0.07 | ITDDK | 0.07 |
| TTF | 0.33 | ANK | 0.10 | VPGR | 0.51 | QEVY | 0.07 | AETQR | 0.06 |
| IPK | 0.32 | ADK | 0.10 | VIAW | 0.50 | AETR | 0.06 | NSESK | 0.05 |
| ATM | 0.31 | HDK | 0.10 | CQVM | 0.49 | TQVR | 0.06 | TEDSR | 0.05 |
| PVR | 0.31 | ASK | 0.09 | QAPR | 0.47 | ANEQ | 0.06 | NETIQ | 0.05 |
| VVF | 0.30 | VNR | 0.09 | QSPR | 0.43 | ETIH | 0.05 | TGESE | 0.03 |
| GTR | 0.30 | AER | 0.09 | GVCH | 0.42 | EVAR | 0.05 | TTGEQ | 0.03 |
| GVR | 0.28 | QAK | 0.09 | DVGM | 0.40 | ESDS | 0.05 | VVVNK | 0.03 |
| SAR | 0.28 | ESL | 0.08 | QDGY | 0.39 | QAEK | 0.05 | TEATK | 0.03 |
| TGR | 0.28 | AVA | 0.08 | KPNY | 0.37 | ESER | 0.05 | TEVVE | 0.02 |

### Figure captions

**Fig. S1** Molecular docking result of peptides with the umami receptor T1R1/T1R3

#### KPW

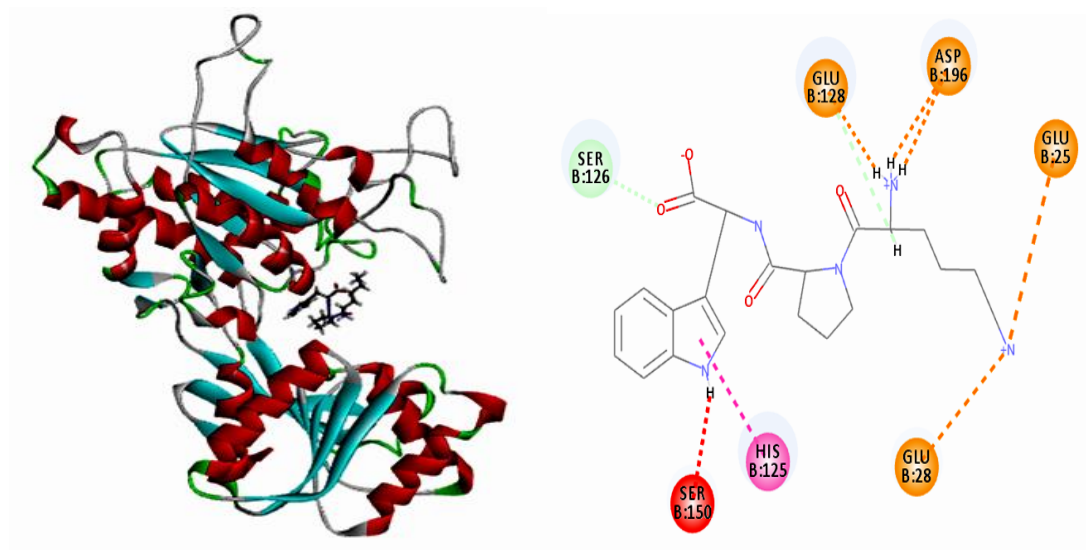

#### GGR

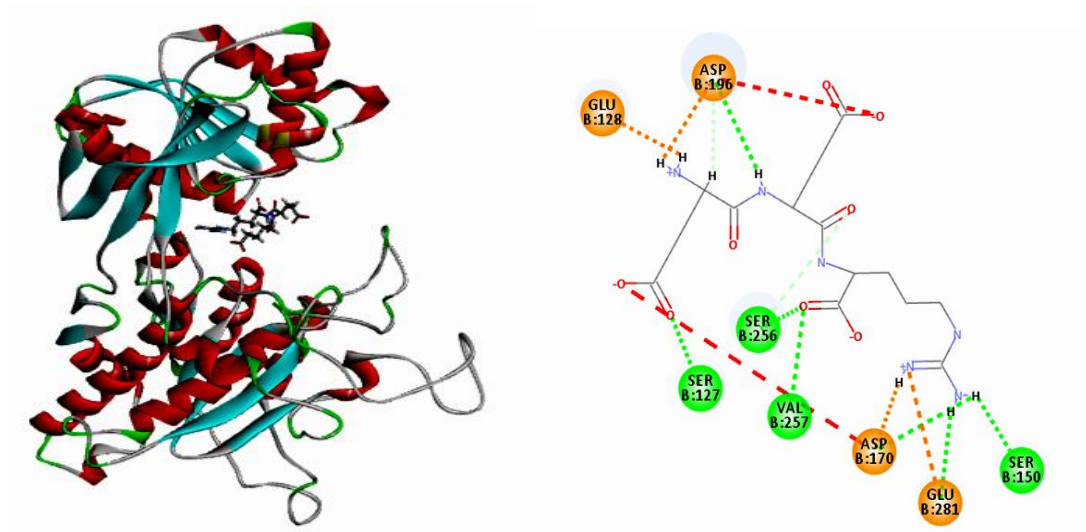

### DNW

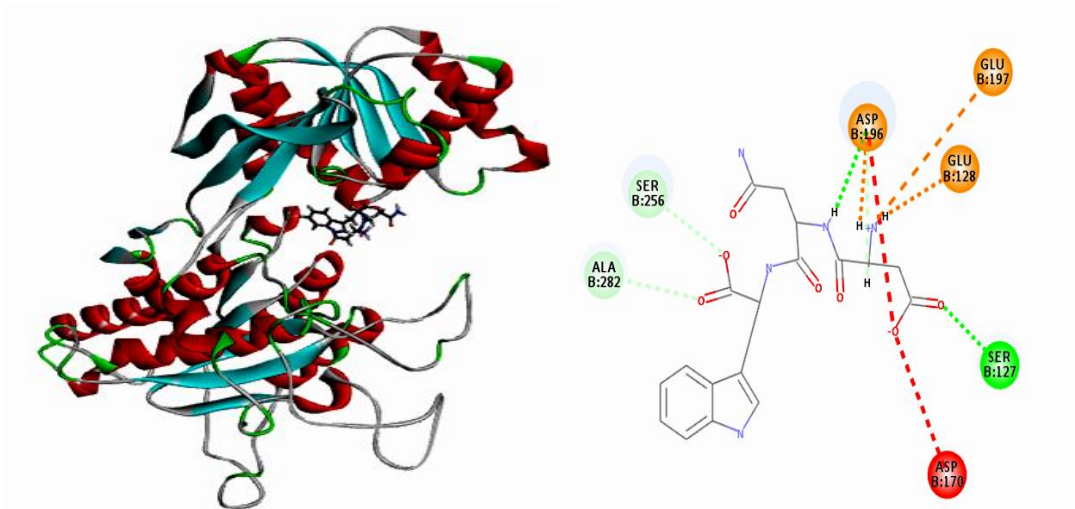

### RPL

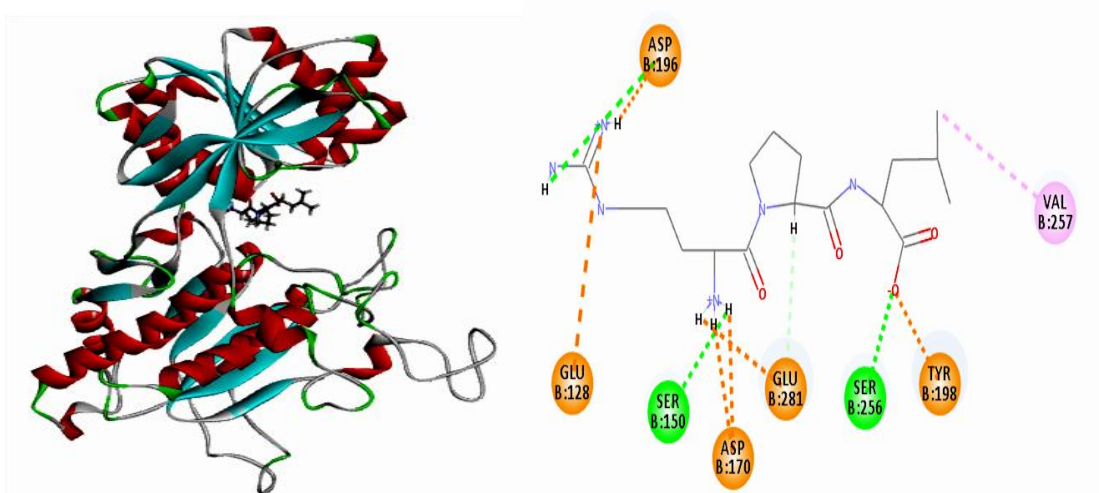

### GDM

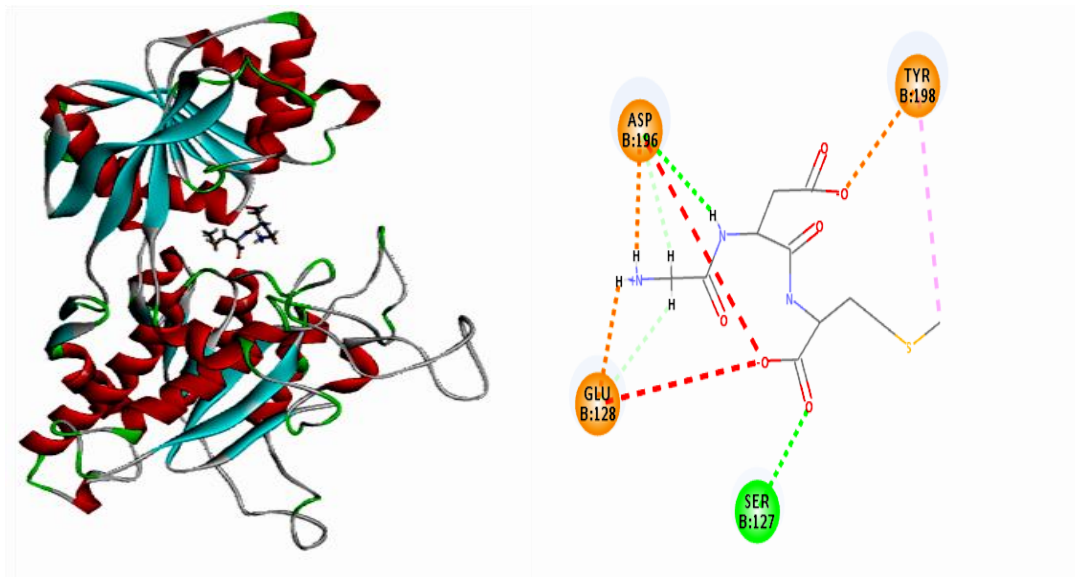

### MDW

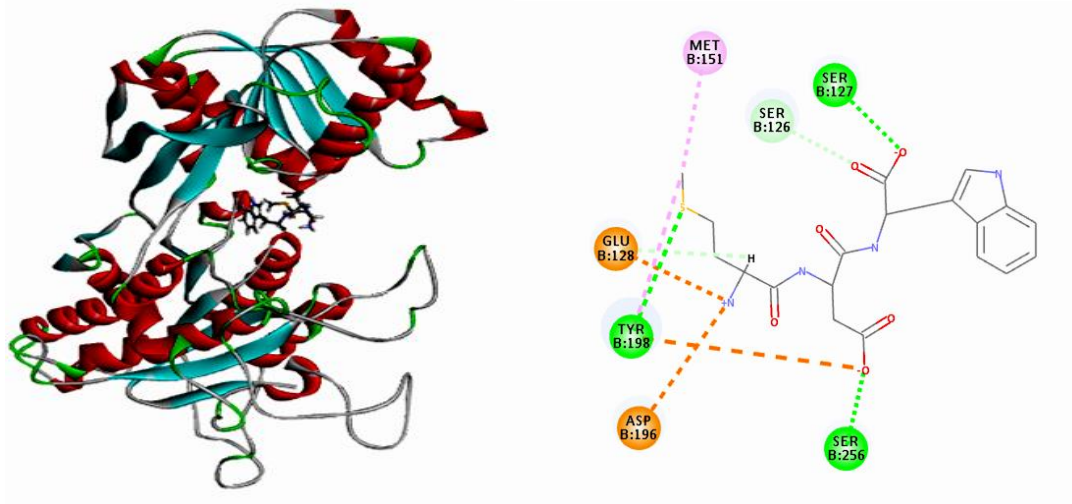

### DDF

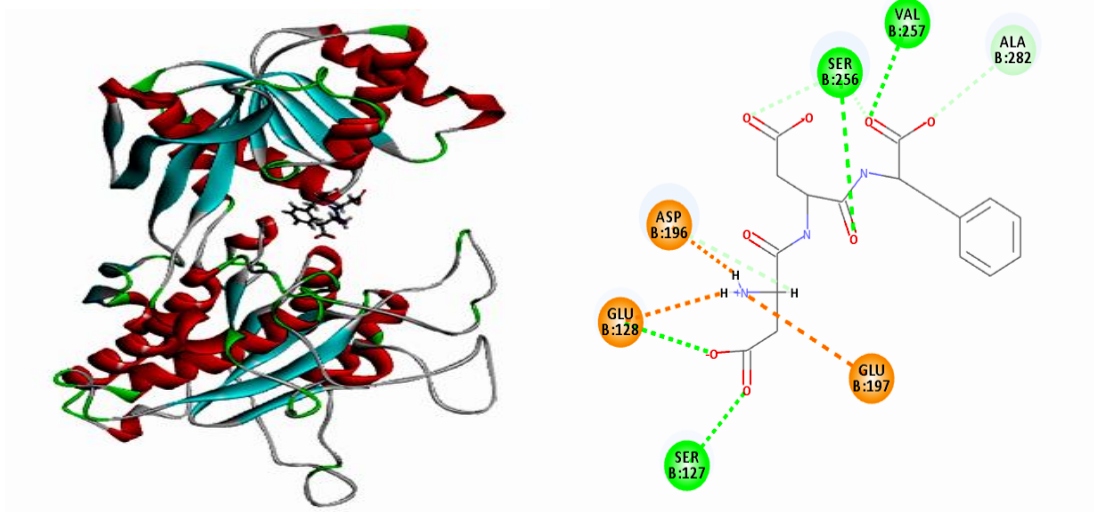

### QDF

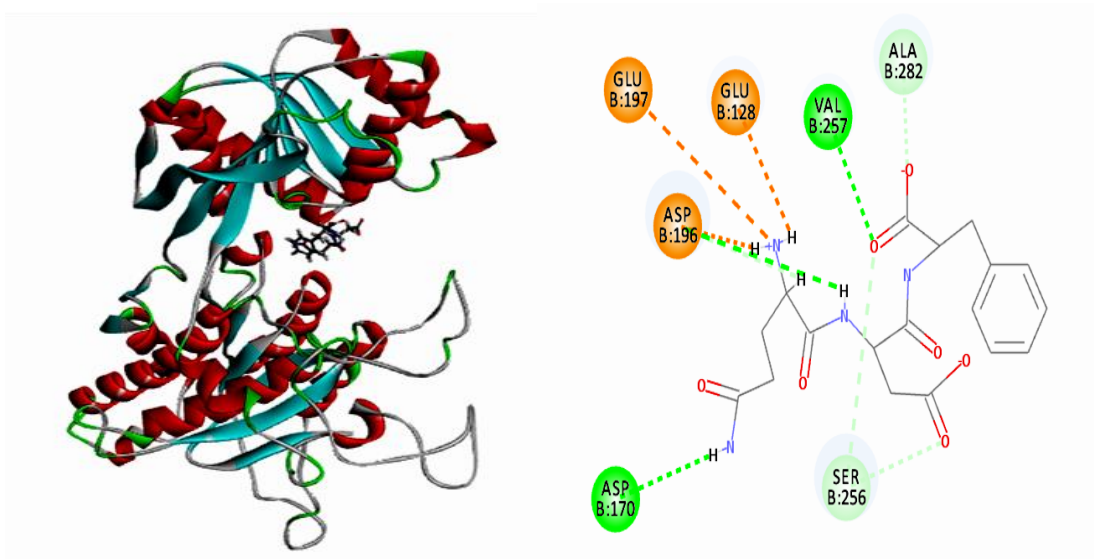

## EGF

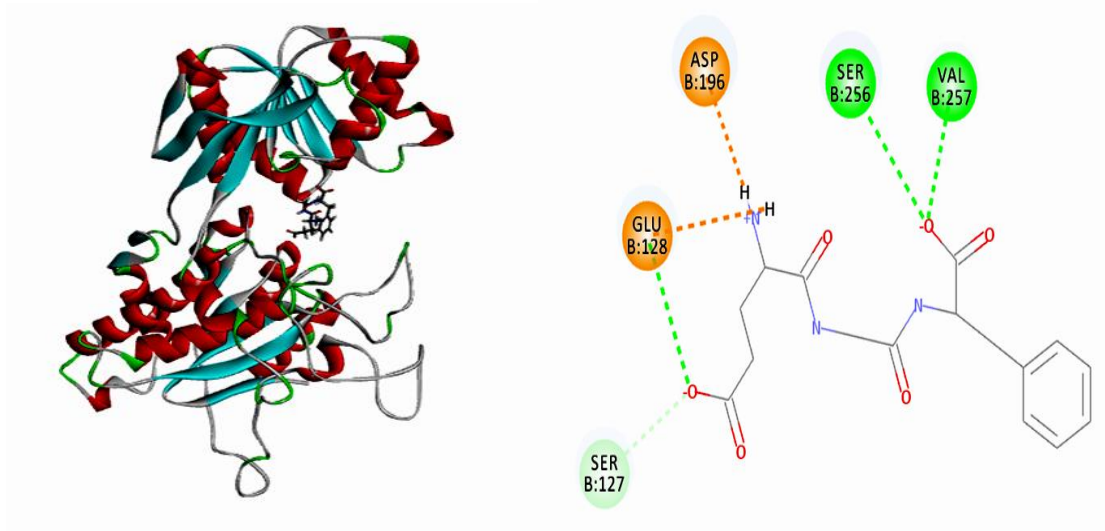

## ICR

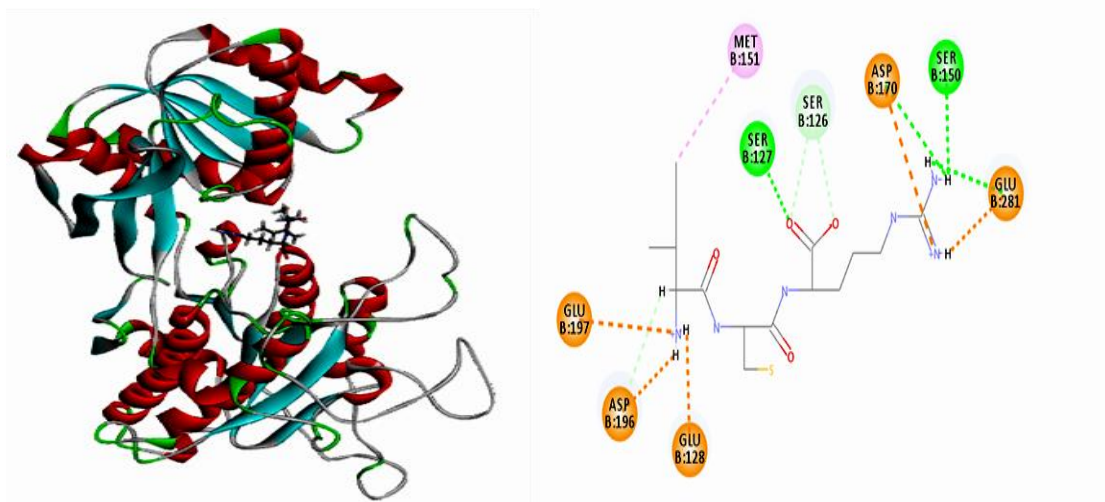

## ADC

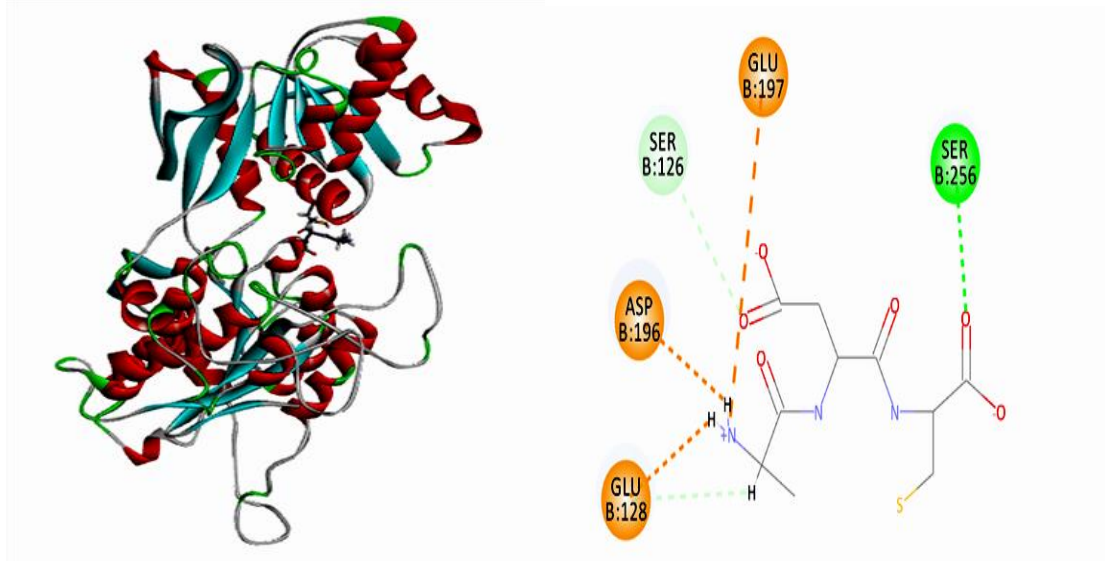

### GDY

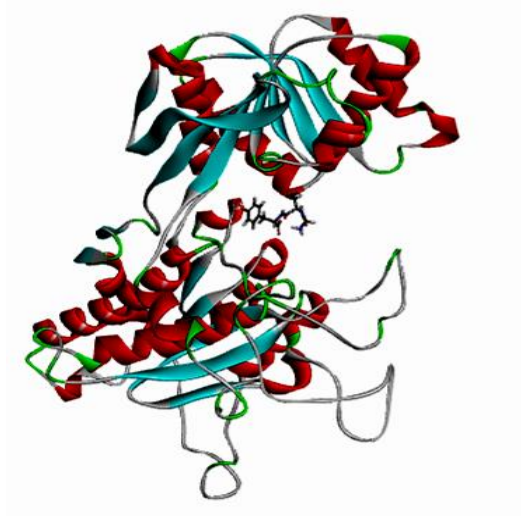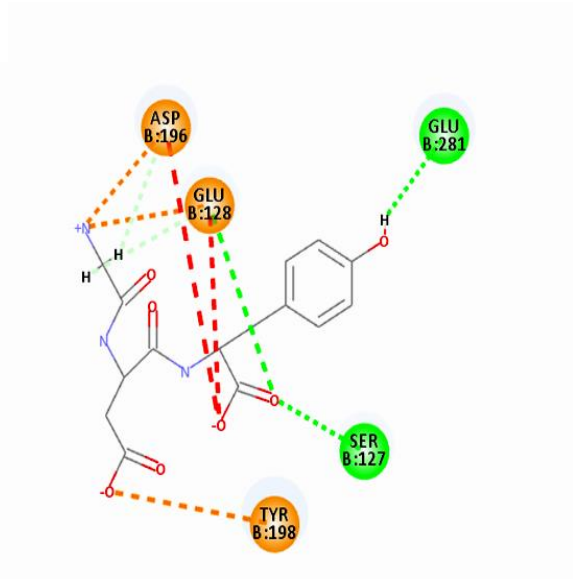

### IGDM

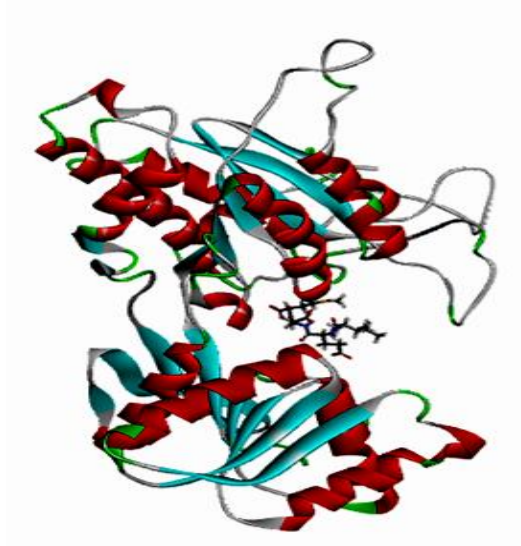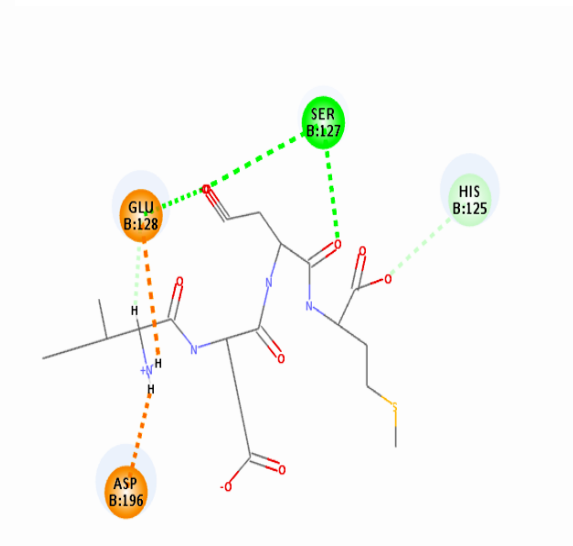

### AGCD

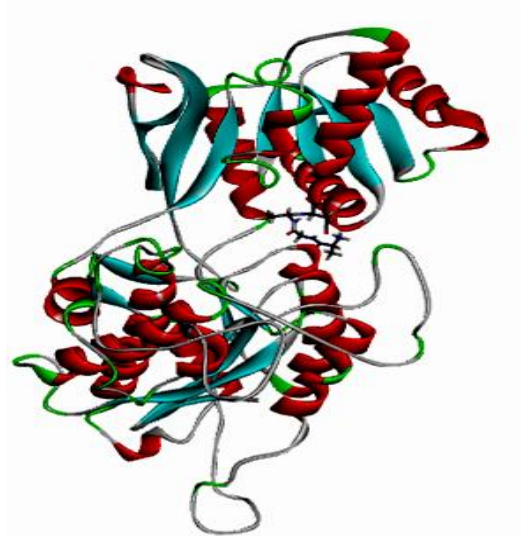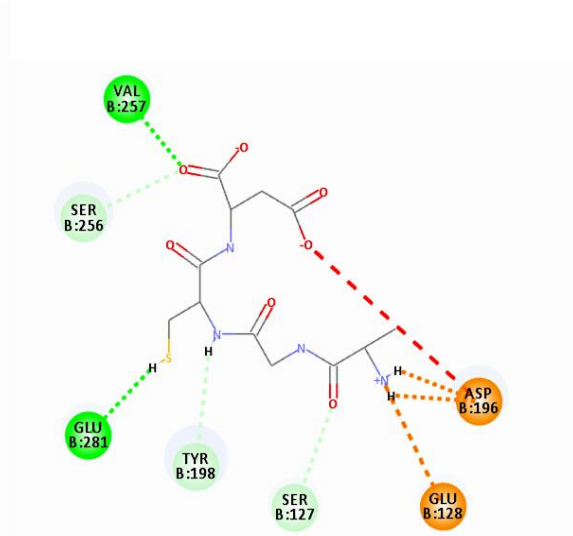

### DCIY

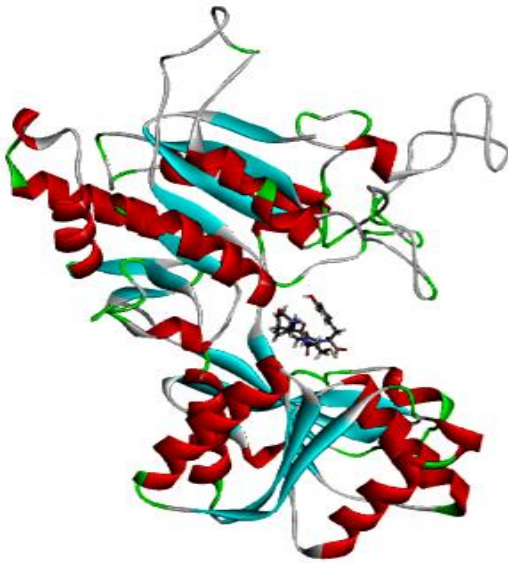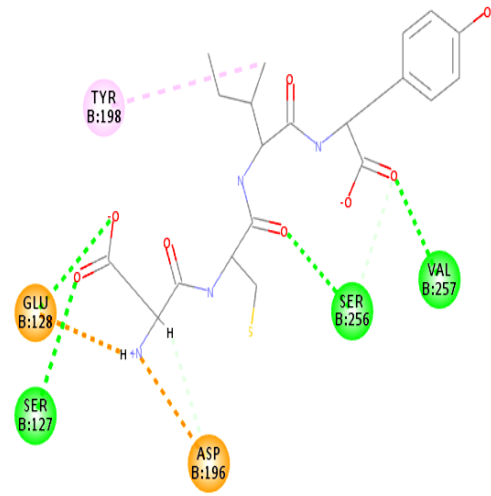

### SPAR

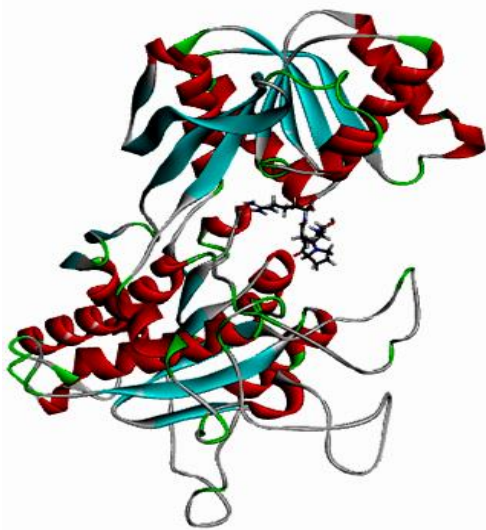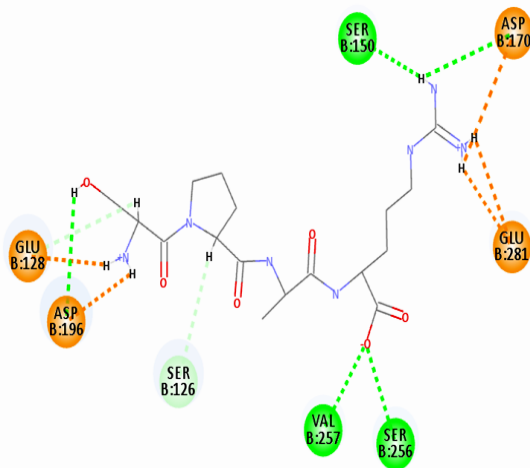

### QDTW

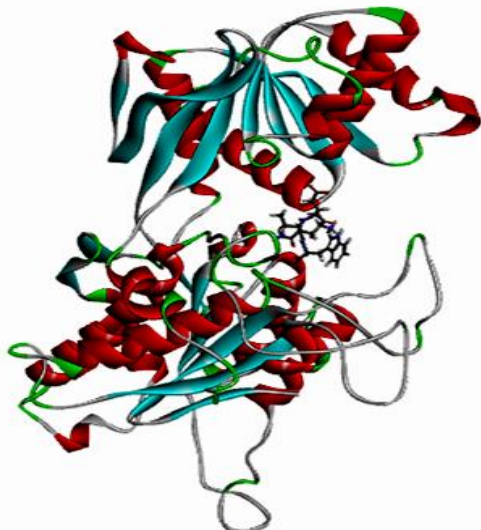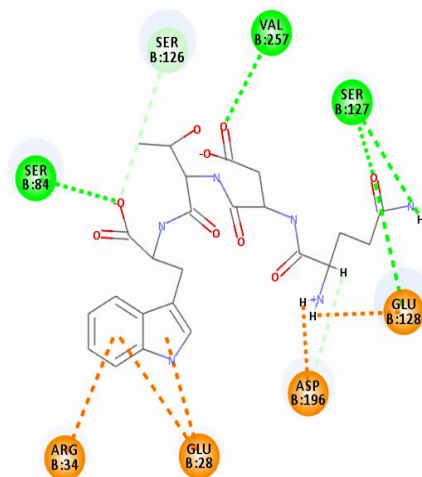

### VPGR

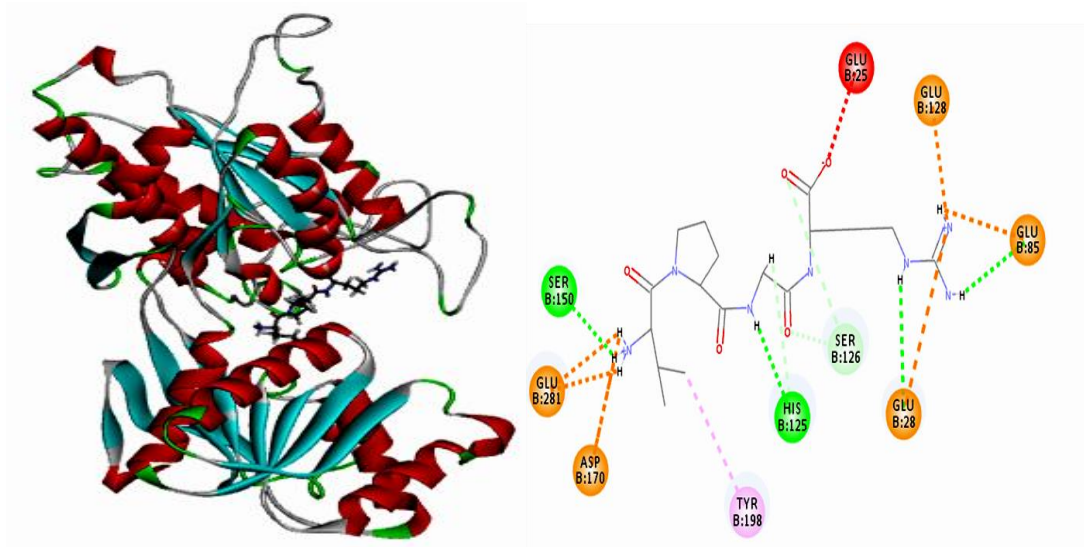

### GPPK

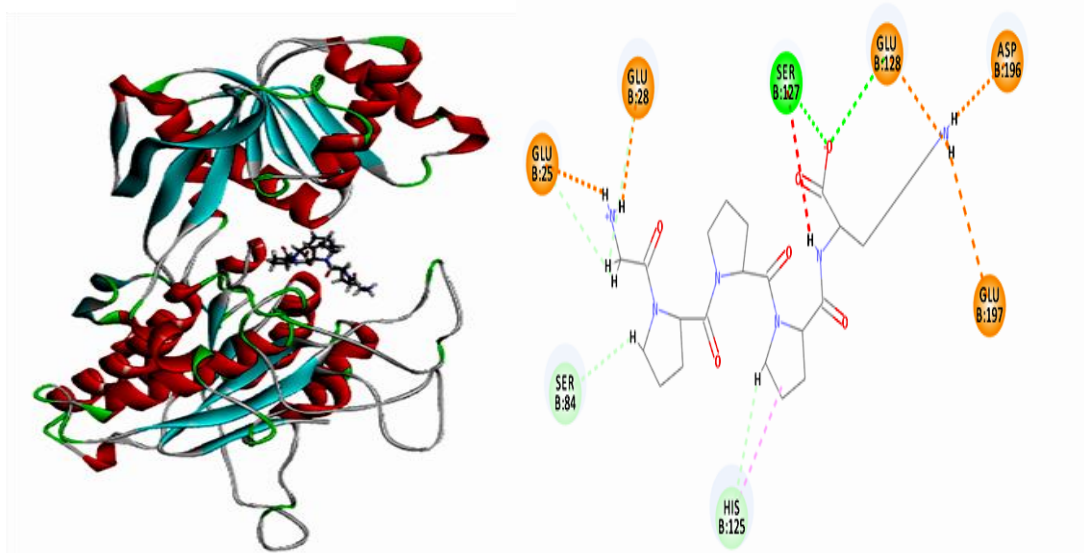

### SGDAW

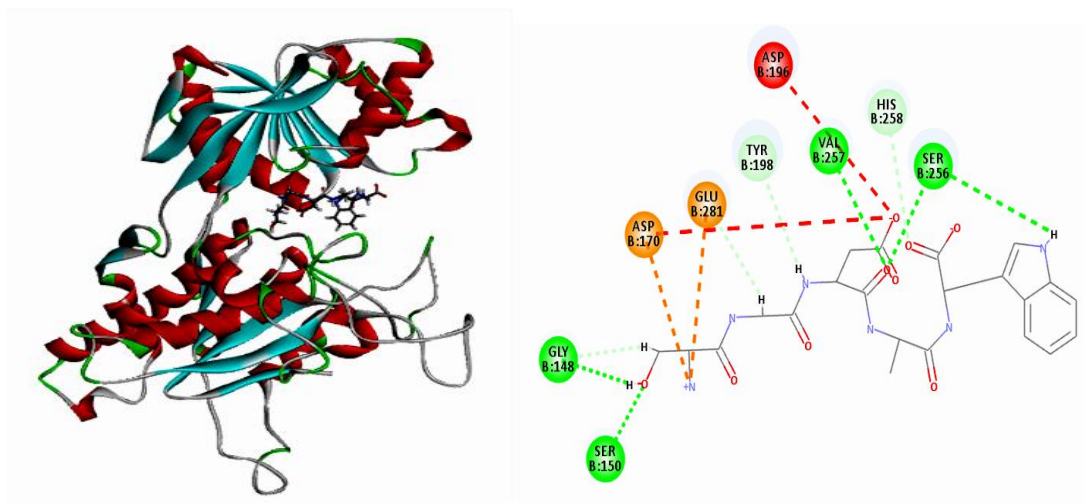



## NDDGW

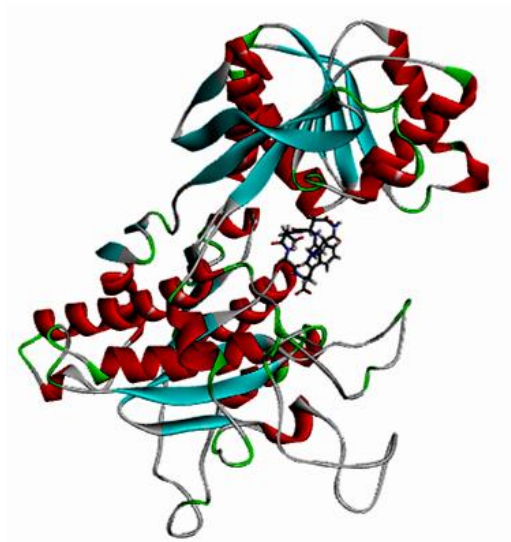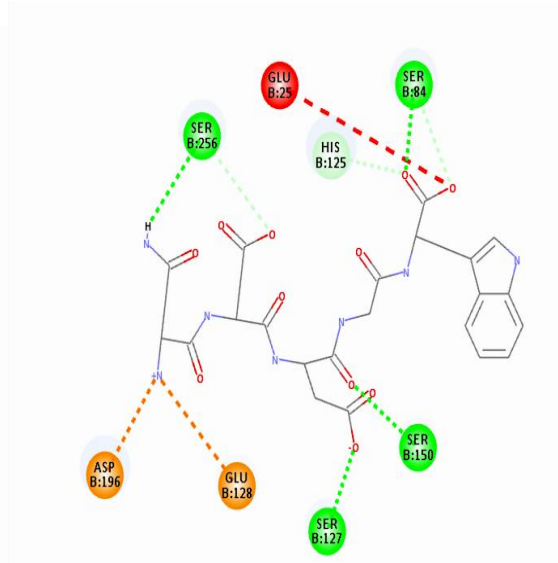

## GQPRP

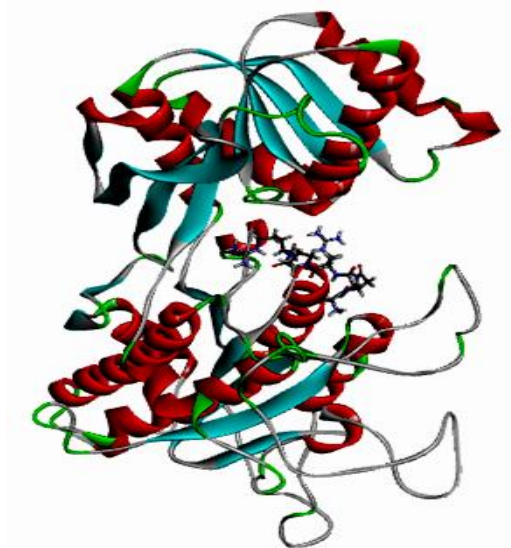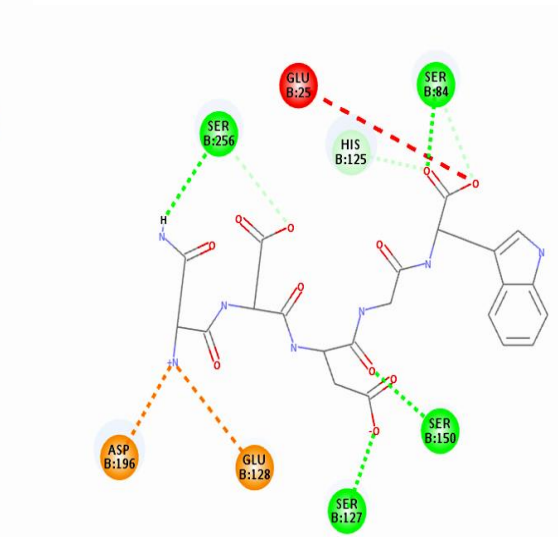

Supplement: d2fo03776a1.pdf [file d2fo03776a1.pdf]
